# Supplementary material for: Field evaluation of selected cassava genotypes for cassava brown streak disease based on symptom expression and virus load
Source: Springer Nature journal article supplement (doi:10.1186/s12985-014-0216-x), 2014-12-01
Supplement: MOESM1 [file 9770018]

**Table S1: Absolute  $C_t$  values of technical replicates for UCBSV in selected genotypes in Uganda observed at 3,5,7,9 and 11 MAP**

| Genotype  | Ct value of UCBSV |       |       |       |       |       |       |       |        |       |
|-----------|-------------------|-------|-------|-------|-------|-------|-------|-------|--------|-------|
|           | 3 MAP             |       | 5 MAP |       | 7 MAP |       | 9 MAP |       | 11 MAP |       |
|           | Rep 1             | Rep 2 | Rep 1 | Rep 2 | Rep 1 | Rep 2 | Rep 1 | Rep 2 | Rep 1  | Rep 2 |
| NASE 14   | 37.24             | 37.00 | 35.67 | 36.25 | 31.23 | 31.63 | 35.23 | 36.47 | 37.12  | 37.62 |
| AR40-6    | 28.13             | 30.65 | 27.69 | 26.69 | 30.75 | 16.43 | 20.88 | 20.72 | 34.91  | 35.11 |
| Kibaha    | 40                | 40    | 35.82 | 35.26 | 34.06 | 32.74 | 30.52 | 31.00 | 27.31  | 27.37 |
| NDL06-132 | 37.29             | 38.97 | 34.91 | 33.13 | 32.57 | 32.37 | 25.74 | 25.62 | 19.61  | 19.51 |
| Kiroba    | 40                | 40    | 34.74 | 33.78 | 34.43 | 34.10 | 40    | 40    | 40     | 40    |
| Albert    | 33.61             | 34.73 | 32.61 | 33.19 | 31.97 | 31.47 | 20.65 | 20.25 | 17.28  | 17.04 |
| NASE 1    | 40                | 40    | 40    | 40    | 40    | 40    | 39.06 | 38.91 | 33.15  | 33.33 |
| Namikonga | 38.47             | 38.07 | 37.22 | 37.90 | 37.62 | 34.84 | 36.01 | 37.89 | 35.68  | 36.07 |
| Tz/130    | 35.19             | 37.49 | 39.51 | 38.53 | 34.91 | 37.17 | 36.21 | 37.31 | 36.35  | 35.84 |
| NASE 19   | 37.08             | 37.43 | 37.92 | 38.66 | 33.84 | 35.88 | 35.01 | 34.07 | 33.99  | 34.33 |
| TME 204   | 39.72             | 39.18 | 27.01 | 28.27 | 20.43 | 21.85 | 18.52 | 19.56 | 18.52  | 18.42 |

**Table S2: Absolute  $C_t$  values of technical replicates for CBSV in selected genotypes in Uganda observed at 3,5,7,9 and 11 MAP**

| Genotype  | Ct value of CBSV |       |       |       |       |       |       |       |        |       |
|-----------|------------------|-------|-------|-------|-------|-------|-------|-------|--------|-------|
|           | 3 MAP            |       | 5 MAP |       | 7 MAP |       | 9 MAP |       | 11 MAP |       |
|           | Rep 1            | Rep 2 | Rep 1 | Rep 2 | Rep 1 | Rep 2 | Rep 1 | Rep 2 | Rep 1  | Rep 2 |
| NASE 14   | 21.32            | 23.86 | 19.67 | 19.41 | 16.31 | 16.37 | 29.49 | 29.14 | 33.53  | 33.22 |
| AR40-6    | 38.91            | 38.41 | 36.91 | 35.83 | 31.54 | 32.99 | 31.74 | 31.17 | 20.87  | 20.89 |
| Kibaha    | 40               | 40    | 26.72 | 27.20 | 23.71 | 23.71 | 20.79 | 20.80 | 24.82  | 25.31 |
| NDL06-132 | 35.50            | 35.77 | 21.55 | 20.11 | 14.79 | 15.27 | 32.83 | 34.77 | 17.49  | 17.16 |
| Kiroba    | 40               | 40    | 35.44 | 36.00 | 31.00 | 31.09 | 31.49 | 30.93 | 34.32  | 34.84 |
| Albert    | 36.15            | 35.96 | 21.34 | 21.94 | 18.49 | 18.69 | 19.99 | 19.86 | 19.60  | 19.61 |
| NASE 1    | 33.88            | 36.12 | 27.88 | 27.24 | 16.27 | 16.25 | 20.84 | 20.88 | 18.16  | 18.39 |
| Namikonga | 40               | 40    | 26.66 | 27.54 | 22.47 | 22.84 | 30.54 | 30.34 | 21.37  | 21.17 |
| Tz/130    | 37.98            | 37.72 | 23.47 | 23.15 | 19.59 | 19.68 | 31.07 | 30.39 | 21.26  | 21.28 |
| NASE 19   | 40               | 40    | 33.69 | 32.33 | 31.09 | 30.86 | 29.66 | 29.64 | 33.20  | 33.88 |
| TME 204   | 36.11            | 35.07 | 19.94 | 18.90 | 14.87 | 16.17 | 18.00 | 18.66 | 16.59  | 17.99 |
